# Supplementary material for: Assessment of Environmental Pollution and Human Exposure to Pesticides by Wastewater Analysis in a Seven-Year Study in Athens, Greece
Source: MDPI journal article supplement (doi:10.3390/toxics9100260), 2021-10-11
Supplement: s1 [file s1]

## Supplementary Materials:

# Assessment of Environmental Pollution and Human Exposure to Pesticides by Wastewater Analysis in a Seven-Year Study in Athens, Greece

Nikolaos I. Rousis, Maria Denardou, Nikiforos Alygizakis, Aikaterini Galani, Anna A. Bletsou, Dimitrios E. Damalas, Niki C. Maragou, Kevin V. Thomas and Nikolaos S. Thomaidis

**Table S1.** Analytical standards of parent pesticides, transformation products and metabolites.

|    | Pesticide                                         | Chemical formula                                                             |
|----|---------------------------------------------------|------------------------------------------------------------------------------|
| 1  | 1,2,3,6-Tetrahydrophthalimide (cis-)              | C <sub>8</sub> H <sub>9</sub> NO <sub>2</sub>                                |
| 2  | 1,3,5(10)-estratrien-3 16' 17'-triol (E3 estriol) | C <sub>18</sub> H <sub>24</sub> O <sub>3</sub>                               |
| 3  | 1-Naphthylacetic acid                             | C <sub>12</sub> H <sub>10</sub> O <sub>2</sub>                               |
| 4  | 2,3,4,6-Tetrachlorophenol                         | C <sub>6</sub> H <sub>2</sub> Cl <sub>4</sub> O                              |
| 5  | 2,4,5-T                                           | C <sub>8</sub> H <sub>5</sub> Cl <sub>3</sub> O <sub>3</sub>                 |
| 6  | 2,4,6-Trichlorophenol                             | C <sub>6</sub> H <sub>3</sub> Cl <sub>3</sub> O                              |
| 7  | 2,4-D                                             | C <sub>8</sub> H <sub>6</sub> Cl <sub>2</sub> O <sub>3</sub>                 |
| 8  | 2,4-DB                                            | C <sub>10</sub> H <sub>10</sub> Cl <sub>2</sub> O <sub>3</sub>               |
| 9  | 2,4-DB-methylester                                | C <sub>11</sub> H <sub>12</sub> Cl <sub>2</sub> O <sub>3</sub>               |
| 10 | 2,4-D-butylester                                  | C <sub>12</sub> H <sub>14</sub> Cl <sub>2</sub> O <sub>3</sub>               |
| 11 | 2,4-Dimethylaniline (Metabolite of Amitraz)       | C <sub>8</sub> H <sub>11</sub> N                                             |
| 12 | 2,4-D-methylester                                 | C <sub>9</sub> H <sub>8</sub> Cl <sub>2</sub> O <sub>3</sub>                 |
| 13 | 2-Aminobenzimidazole                              | C <sub>7</sub> H <sub>7</sub> N <sub>3</sub>                                 |
| 14 | 2-Benzyltetronic acid                             | C <sub>11</sub> H <sub>10</sub> O <sub>3</sub>                               |
| 15 | 2-Methyl-4-amino-6-methoxy-s-triazine             | C <sub>5</sub> H <sub>8</sub> N <sub>4</sub> O                               |
| 16 | 2-Phenethylamine                                  | C <sub>8</sub> H <sub>11</sub> N                                             |
| 17 | 2-Phenylphenol                                    | C <sub>12</sub> H <sub>10</sub> O                                            |
| 18 | 3,4-(dichlorophenyl)-3-methyl urea                | C <sub>8</sub> H <sub>8</sub> Cl <sub>2</sub> N <sub>2</sub> O               |
| 19 | 3,4-(dichlorophenyl)-urea                         | C <sub>7</sub> H <sub>6</sub> Cl <sub>2</sub> N <sub>2</sub> O               |
| 20 | 3,4-dichloroaniline                               | C <sub>6</sub> H <sub>5</sub> Cl <sub>2</sub> N                              |
| 21 | 5-Chloro-2-methyl-4-isothiazolin-3-on (CMI)       | C <sub>4</sub> H <sub>4</sub> ClNOS                                          |
| 22 | Acephate                                          | C <sub>4</sub> H <sub>10</sub> NO <sub>3</sub> PS                            |
| 23 | Acetamiprid                                       | C <sub>10</sub> H <sub>11</sub> CIN <sub>4</sub>                             |
| 24 | Acetiamine                                        | C <sub>16</sub> H <sub>22</sub> N <sub>4</sub> O <sub>4</sub> S              |
| 25 | Acetochlor                                        | C <sub>14</sub> H <sub>20</sub> CINO <sub>2</sub>                            |
| 26 | Acetochlor-ESA                                    | C <sub>14</sub> H <sub>21</sub> NO <sub>5</sub> S                            |
| 27 | Acetochlor-OXA                                    | C <sub>14</sub> H <sub>19</sub> NO <sub>4</sub>                              |
| 28 | Acibenzolar-S-Methyl                              | C <sub>8</sub> H <sub>6</sub> N <sub>2</sub> OS <sub>2</sub>                 |
| 29 | Acifluorfen                                       | C <sub>14</sub> H <sub>7</sub> ClF <sub>3</sub> NO <sub>5</sub>              |
| 30 | Aclonifen                                         | C <sub>12</sub> H <sub>9</sub> CIN <sub>2</sub> O <sub>3</sub>               |
| 31 | Acrinathrin                                       | C <sub>26</sub> H <sub>21</sub> F <sub>6</sub> NO <sub>5</sub>               |
| 32 | Alachlor                                          | C <sub>14</sub> H <sub>20</sub> CINO <sub>2</sub>                            |
| 33 | Alachlor-ESA                                      | C <sub>14</sub> H <sub>21</sub> NO <sub>5</sub> S                            |
| 34 | Alachlor-OXA                                      | C <sub>14</sub> H <sub>19</sub> NO <sub>4</sub>                              |
| 35 | Alanycarb                                         | C <sub>17</sub> H <sub>25</sub> N <sub>3</sub> O <sub>4</sub> S <sub>2</sub> |
| 36 | Albendazole                                       | C <sub>12</sub> H <sub>15</sub> N <sub>3</sub> O <sub>2</sub> S              |
| 37 | Albendazole sulfone                               | C <sub>12</sub> H <sub>15</sub> N <sub>3</sub> O <sub>4</sub> S              |
| 38 | Aldicarb                                          | C <sub>7</sub> H <sub>14</sub> N <sub>2</sub> O <sub>2</sub> S               |
| 39 | Aldicarb-sulfone (Aldoxycarb)                     | C <sub>7</sub> H <sub>14</sub> N <sub>2</sub> O <sub>4</sub> S               |
| 40 | Aldicarb-sulfoxide                                | C <sub>7</sub> H <sub>14</sub> N <sub>2</sub> O <sub>3</sub> S               |

|    |                                                            |                |
|----|------------------------------------------------------------|----------------|
| 41 | Allethrin I                                                | C19H26O3       |
| 42 | Allethrin II                                               | C19H26O3       |
| 43 | Allidochlor                                                | C8H12ClNO      |
| 44 | Ametryn                                                    | C9H17N5S       |
| 45 | Amidosulfuron                                              | C9H15N5O7S2    |
| 46 | Aminocarb (Metacil)                                        | C11H16N2O2     |
| 47 | Amitraz                                                    | C19H23N3       |
| 48 | Amitrole                                                   | C2H4N4         |
| 49 | Amorolfine                                                 | C21H35NO       |
| 50 | Anabasine                                                  | C10H14N2       |
| 51 | Ancymidol                                                  | C15H16N2O2     |
| 52 | Anilazine. Dyrene                                          | C9H5Cl3N4      |
| 53 | Anilofos                                                   | C13H19ClNO3PS2 |
| 54 | Aramite                                                    | C15H23ClO4S    |
| 55 | Asana (Esfenvalerate)                                      | C25H22ClNO3    |
| 56 | Aspon                                                      | C12H28O5P2S2   |
| 57 | Asulam                                                     | C8H10N2O4S     |
| 58 | Atraton                                                    | C9H17N5O       |
| 59 | Atrazin-desethyl-2-hydroxy (Prometon-Hydroxy-Desisopropyl) | C6H11N5O       |
| 60 | Atrazine                                                   | C8H14ClN5      |
| 61 | Atrazine-2-Hydroxy                                         | C8H15N5O       |
| 62 | Atrazine-desethyl                                          | C6H10ClN5      |
| 63 | Atrazine-desethyl-desisopropyl                             | C3H4ClN5       |
| 64 | Atrazine-desisopropyl                                      | C5H8ClN5       |
| 65 | Atropine                                                   | C17H23NO3      |
| 66 | AvermectinB1a (Abamectin)                                  | C48H72O14      |
| 67 | AvermectinB1b (Abamectin)                                  | C47H70O14      |
| 68 | Azaconazole                                                | C12H11Cl2N3O2  |
| 69 | Azadirachtin                                               | C35H44O16      |
| 70 | Azimsulfuron                                               | C13H16N10O5S   |
| 71 | Azinphos-ethyl                                             | C12H16N3O3PS2  |
| 72 | Azinphos-methyl (Guthion)                                  | C10H12N3O3PS2  |
| 73 | Aziprotryne                                                | C7H11N7S       |
| 74 | Azoxystrobin                                               | C22H17N3O5     |
| 75 | Azoxystrobin acid                                          | C21H15N3O5     |
| 76 | Barban                                                     | C11H9Cl2NO2    |
| 77 | Beflubutamid                                               | C18H17F4NO2    |
| 78 | Benalaxyl                                                  | C20H23NO3      |
| 79 | Benazolin                                                  | C9H6ClNO3S     |
| 80 | Bendiocarb                                                 | C11H13NO4      |
| 81 | Benfuracarb                                                | C20H30N2O5S    |
| 82 | Benodanil                                                  | C13H10INO      |
| 83 | Benomyl                                                    | C14H18N4O3     |
| 84 | Benoxacor                                                  | C11H11Cl2NO2   |
| 85 | Bensulfuron-methyl                                         | C16H18N4O7S    |
| 86 | Bensulide                                                  | C14H24NO4PS3   |
| 87 | Bensultap                                                  | C17H21NO4S4    |
| 88 | Bentazone                                                  | C10H12N2O3S    |
| 89 | Benthiavalicarb-isopropyl                                  | C18H24FN3O3S   |
| 90 | Benzethonium                                               | C27H42NO2      |
| 91 | Benzoic acid, 3-5-dibromo-4-hydroxy                        | C7H4Br2O3      |
| 92 | Benzoximate                                                | C18H18ClNO5    |
| 93 | Benzoylprop-ethyl                                          | C18H17Cl2NO3   |
| 94 | Benzthiazuron                                              | C9H9N3OS       |
| 95 | Bifenazate                                                 | C17H20N2O3     |
| 96 | Bifenox                                                    | C14H9Cl2NO5    |
| 97 | Bifenox acid                                               | C13H7Cl2NO5    |

|     |                                         |                 |
|-----|-----------------------------------------|-----------------|
| 98  | Bifenthrin                              | C23H22ClF3O2    |
| 99  | Bioallethrin                            | C19H26O3        |
| 100 | Bioresmethrin                           | C22H26O3        |
| 101 | Bispyribac                              | C19H18N4O8      |
| 102 | Bitertanol                              | C20H23N3O2      |
| 103 | Boscalid                                | C18H12Cl2N2O    |
| 104 | Bromacil                                | C9H13BrN2O2     |
| 105 | Bromadiolone                            | C30H23BrO4      |
| 106 | Bromophos (Bromophos-methyl)            | C8H8BrCl2O3PS   |
| 107 | Bromophos-ethyl                         | C10H12BrCl2O3PS |
| 108 | Bromopropylate                          | C17H16Br2O3     |
| 109 | Bromoxynil                              | C7H3Br2NO       |
| 110 | Bromuconazole                           | C13H12BrCl2N3O  |
| 111 | Bupirimate                              | C13H24N4O3S     |
| 112 | Buprofezin (Z-isomer Buprofezin)        | C16H23N3OS      |
| 113 | Butachlor                               | C17H26ClNO2     |
| 114 | Butafenacil                             | C20H18ClF3N2O6  |
| 115 | Butamifos                               | C13H21N2O4PS    |
| 116 | Butocarbim-sulfoxid                     | C7H14N2O3S      |
| 117 | Butoxycarbim                            | C7H14N2O4S      |
| 118 | Butralin                                | C14H21N3O4      |
| 119 | Buturon                                 | C12H13ClN2O     |
| 120 | Butylate                                | C11H23NOS       |
| 121 | Cadusafos                               | C10H23O2PS2     |
| 122 | Cambendazol                             | C14H14N4O2S     |
| 123 | Captafol                                | C10H9Cl4NO2S    |
| 124 | Captan                                  | C9H8Cl3NO2S     |
| 125 | Carbamazine-Diethyl                     | C10H21N3O       |
| 126 | Carbaryl                                | C12H11NO2       |
| 127 | Carbendazim                             | C9H9N3O2        |
| 128 | Carbetamide                             | C12H16N2O3      |
| 129 | Carbofuran                              | C12H15NO3       |
| 130 | Carbofuran-3-hydroxy                    | C12H15NO4       |
| 131 | Carbophenothion                         | C11H16ClO2PS3   |
| 132 | Carbosulfan                             | C20H32N2O3S     |
| 133 | Carboxin                                | C12H13NO2S      |
| 134 | Carfentrazone-ethyl                     | C15H14Cl2F3N3O3 |
| 135 | CGA 321113 (Trifloxystrobin Metabolite) | C19H17F3N2O4    |
| 136 | Chloramben                              | C7H5Cl2NO2      |
| 137 | Chlorantraniliprole                     | C18H14BrCl2N5O2 |
| 138 | Chlorbromuron                           | C9H10BrClN2O2   |
| 139 | Chlorbufam                              | C11H10ClNO2     |
| 140 | Chlorcyclizine                          | C18H21ClN2      |
| 141 | Chlordimeform                           | C10H13ClN2      |
| 142 | Chlorfenapyr                            | C15H11BrClF3N2O |
| 143 | Chlorfenprop-methyl                     | C10H10Cl2O2     |
| 144 | Chlorfenson                             | C12H8Cl2O3S     |
| 145 | Chlorfenvinphos (E/Z)                   | C12H14Cl3O4P    |
| 146 | Chlorfluazuron                          | C20H9Cl3F5N3O3  |
| 147 | Chloridazone                            | C10H8ClN3O      |
| 148 | Chloridazone-methyl-desphenyl           | C5H6ClN3O       |
| 149 | Chlorimuronethyl                        | C15H15ClN4O6S   |
| 150 | Chlormequat                             | C5H13ClN        |
| 151 | Chlorobenzilate                         | C16H14Cl2O3     |
| 152 | Chlorophacinone                         | C23H15ClO3      |
| 153 | Chloropropylate                         | C17H16Cl2O3     |
| 154 | Chlorothalonil-4-hydroxy                | C8H9N2OCl3      |

|     |                                              |                |
|-----|----------------------------------------------|----------------|
| 155 | Chlorothiamid                                | C7H5Cl2NS      |
| 156 | Chlorotoluron                                | C10H13ClN2O    |
| 157 | Chloroxuron (Chloroxifenidim)                | C15H15ClN2O2   |
| 158 | Chlorpropham                                 | C10H12ClNO2    |
| 159 | Chlorpyriphos                                | C9H11Cl3NO3PS  |
| 160 | Chlorpyriphos-methyl                         | C7H7Cl3NO3PS   |
| 161 | Chlorsulfuron                                | C12H12ClN5O4S  |
| 162 | Chlorthal-dimethyl (DCPA, Dacthal)           | C10H6Cl4O4     |
| 163 | Chlorthion                                   | C8H9ClNO5PS    |
| 164 | Chromafenozide                               | C24H30N2O3     |
| 165 | Cinidon-ethyl                                | C19H17Cl2NO4   |
| 166 | Cinosulfuron                                 | C15H19N5O7S    |
| 167 | Clethodim                                    | C17H26ClNO3S   |
| 168 | Climbazole                                   | C15H17ClN2O2   |
| 169 | Clodinafop-propargyl                         | C17H13ClFNO4   |
| 170 | Clofentezine                                 | C14H8Cl2N4     |
| 171 | Clofibric acid                               | C10H11ClO3     |
| 172 | Clomazone                                    | C12H14ClNO2    |
| 173 | Clopyralid                                   | C6H3Cl2NO2     |
| 174 | Clothiandin                                  | C6H8ClN5O2S    |
| 175 | Coumachlor                                   | C19H15ClO4     |
| 176 | Coumaphos                                    | C14H16ClO5PS   |
| 177 | Crimidine                                    | C7H10ClN3      |
| 178 | Crotamiton                                   | C13H17NO       |
| 179 | Crotoxyphos                                  | C14H19O6P      |
| 180 | Crufomate                                    | C12H19ClNO3P   |
| 181 | Cyanazine                                    | C9H13ClN6      |
| 182 | Cyanofenphos                                 | C15H14NO2PS    |
| 183 | Cyanophos                                    | C9H10NO3PS     |
| 184 | Cyazofamid                                   | C13H13ClN4O2S  |
| 185 | Cycloate                                     | C11H21NOS      |
| 186 | Cycloheximide                                | C15H23NO4      |
| 187 | Cycloxydim                                   | C17H27NO3S     |
| 188 | Cycluron                                     | C11H22N2O      |
| 189 | Cyfluthrin (Baythroid)                       | C22H18Cl2FNO3  |
| 190 | Cyhalothrin (lambda-)                        | C23H19ClF3NO3  |
| 191 | Cymoxanil                                    | C7H10N4O3      |
| 192 | Cypermethrin                                 | C22H19Cl2NO3   |
| 193 | Cyprazin                                     | C9H14ClN5      |
| 194 | Cyproconazole                                | C15H18ClN3O    |
| 195 | Cyprodinil                                   | C14H15N3       |
| 196 | Cyromazine                                   | C6H10N6        |
| 197 | Cythioate                                    | C8H12NO5PS2    |
| 198 | Daimuron (Dymron)                            | C17H20N2O      |
| 199 | Dalapon                                      | C3H4Cl2O2      |
| 200 | Dazomet                                      | C5H10N2S2      |
| 201 | DDA (2,2-bis(4-chlorophenyl)-acetic acid)    | C14H10Cl2O2    |
| 202 | DEET (Diethyltoluamide)                      | C12H17NO       |
| 203 | Deltamethrin                                 | C22H19Br2NO3   |
| 204 | Demeton-S                                    | C8H19O3PS2     |
| 205 | Demeton-S-methylsulfone                      | C6H15O5PS2     |
| 206 | Demeton-S-methylsulfoxid (Oxydemeton-methyl) | C6H15O4PS2     |
| 207 | Desmedipham                                  | C16H16N2O4     |
| 208 | Desmetryn                                    | C8H15N5S       |
| 209 | DET                                          | C14H20N2       |
| 210 | Diafenthiuron                                | C23H32N2OS     |
| 211 | Dialifos                                     | C14H17ClNO4PS2 |

|     |                                        |                 |
|-----|----------------------------------------|-----------------|
| 212 | Diallate                               | C10H17Cl2NOS    |
| 213 | Diazinon                               | C12H21N2O3PS    |
| 214 | Diazinon-O-analog                      | C12H21N2O4P     |
| 215 | Dibutylchloredate                      | C17H20Cl6O4     |
| 216 | Dicamba                                | C8H6Cl2O3       |
| 217 | Dicamba-methyl                         | C9H8Cl2O3       |
| 218 | Dicapthon                              | C8H9ClNO5PS     |
| 219 | Dichlofenthion                         | C10H13Cl2O3PS   |
| 220 | Dichlofluanid                          | C9H11Cl2FN2O2S2 |
| 221 | Dichlormid                             | C8H11Cl2NO      |
| 222 | Dichlorobenzamide                      | C12C6H3CONH2    |
| 223 | Dichlorophen                           | C13H10Cl2O2     |
| 224 | Dichlorprop                            | C9H8Cl2O3       |
| 225 | Dichlorprop-methyl                     | C10H10Cl2O3     |
| 226 | Dichlorvos                             | C4H7Cl2O4P      |
| 227 | Diclobutrazol                          | C15H19Cl2N3O    |
| 228 | Diclofop                               | C15H12Cl2O4     |
| 229 | Diclofop-methyl                        | C16H14Cl2O4     |
| 230 | Dicloran                               | C6H4Cl2N2O2     |
| 231 | Dicofol                                | C14H9Cl5O       |
| 232 | Dicrotophos                            | C8H16NO5P       |
| 233 | Diethofencarb                          | C14H21NO4       |
| 234 | Difenoconazole                         | C19H17Cl2N3O3   |
| 235 | Difenoxyuron                           | C16H18N2O3      |
| 236 | Difenzoquat                            | C17H17N2        |
| 237 | Diflubenzuron                          | C14H9ClF2N2O2   |
| 238 | Diflufenican                           | C19H11F5N2O2    |
| 239 | Diflufenzopyr                          | C15H12F2N4O3    |
| 240 | Diflufenzopyr                          | C18H24ClN3O     |
| 241 | Dikegulac                              | C12H18O7        |
| 242 | Dimefuron                              | C15H19ClN4O3    |
| 243 | Dimethachlor                           | C13H18ClNO2     |
| 244 | Dimethachlor-ESA                       | C13H19NO5S      |
| 245 | Dimethachlor-OXA                       | C13H17NO4       |
| 246 | Dimethenamid                           | C12H18ClNO2S    |
| 247 | Dimethenamid-ESA                       | C12H19N1O5S2    |
| 248 | Dimethenamid-OXA                       | C12H17NO4S      |
| 249 | Dimethipin                             | C6H10O4S2       |
| 250 | Dimethirimol                           | C11H19N3O       |
| 251 | Dimethoate                             | C5H12NO3PS2     |
| 252 | Dimethomorph                           | C21H22ClNO4     |
| 253 | Dimethylanilin (N.N-)                  | C8H11N          |
| 254 | Dimethyl-phthalate                     | C10H10O4        |
| 255 | Dimethylvinphos                        | C10H10Cl3O4P    |
| 256 | Dimetridazole                          | C5H7N3O2        |
| 257 | Dimoxystrobin                          | C19H22N2O3      |
| 258 | Dinex (2-Cyclohexyl-4,6-dinitrophenol) | C12H14N2O5      |
| 259 | Diniconazole                           | C15H17Cl2N3O    |
| 260 | Dinocap                                | C18H24N2O6      |
| 261 | Dinoseb                                | C10H12N2O5      |
| 262 | Dinotefuran                            | C7H14N4O3       |
| 263 | Dinoterb                               | C10H12N2O5      |
| 264 | Dioxacarb                              | C11H13NO4       |
| 265 | Dioxathion                             | C12H26O6P2S4    |
| 266 | Diphacinone                            | C23H16O3        |
| 267 | Diphenamid                             | C16H17NO        |
| 268 | Diphenylamine                          | C12H11N         |

|     |                                           |                |
|-----|-------------------------------------------|----------------|
| 269 | Diquat                                    | C12H12N2       |
| 270 | Disulfoton                                | C8H19O2PS3     |
| 271 | Disulfoton-sulfone                        | C8H19O4PS3     |
| 272 | Disulfoton-sulfoxid                       | C8H19O3PS3     |
| 273 | Ditalimfos                                | C12H14NO4PS    |
| 274 | Dithiopyr                                 | C15H16F5NO2S2  |
| 275 | Diuron                                    | C9H10Cl2N2O    |
| 276 | DMSA (N N-Dimethylaminosulfanilid)        | C8H12N2O2S     |
| 277 | DNOC (4.6-dinitro-o-cresol)               | C7H6N2O5       |
| 278 | Dodemorph                                 | C18H35NO       |
| 279 | Dodine                                    | C13H30N3       |
| 280 | Drazoxolon                                | C10H8ClN3O2    |
| 281 | Dyrene (Anilazine)                        | C9H5Cl3N4      |
| 282 | Edifenphos                                | C14H15O2PS2    |
| 283 | Enamectin B1a                             | C49H75NO13     |
| 284 | Enamectin B1b                             | C48H73NO13     |
| 285 | Endosulfan                                | C9H6Cl6O3S     |
| 286 | Endosulfan-sulfate                        | C9H6Cl6O4S     |
| 287 | Endothal                                  | C8H10O5        |
| 288 | EPN                                       | C14H14NO4PS    |
| 289 | Epoxiconazole                             | C17H13ClFN3O   |
| 290 | EPTC                                      | C9H19NOS       |
| 291 | Esprocarb                                 | C15H23NOS      |
| 292 | Etaconazole                               | C14H15Cl2N3O2  |
| 293 | Ethiofencarb                              | C11H15NO2S     |
| 294 | Ethiofencarb-sulfone                      | C11H15NO4S     |
| 295 | Ethiofencarb-sulfoxide                    | C11H15NO3S     |
| 296 | Ethion                                    | C9H22O4P2S4    |
| 297 | Ethiprole                                 | C13H9Cl2F3N4OS |
| 298 | Ethirimol                                 | C11H19N3O      |
| 299 | Ethofumesate                              | C13H18O5S      |
| 300 | Ethoprop                                  | C8H19O2PS2     |
| 301 | Ethoprophos                               | C8H19O2PS2     |
| 302 | Ethoxyquin                                | C14H19NO       |
| 303 | Ethoxysulfuron                            | C15H18N4O7S    |
| 304 | Etoxazole                                 | C21H23F2NO2    |
| 305 | Etrimfos                                  | C10H17N2O4PS   |
| 306 | Famoxadone                                | C22H18N2O4     |
| 307 | Famphur                                   | C10H16NO5PS2   |
| 308 | Fenamidone                                | C17H17N3OS     |
| 309 | Fenamiphos                                | C13H22NO3PS    |
| 310 | Fenamiphos-sulfone                        | C13H22NO5PS    |
| 311 | Fenarimol                                 | C17H12Cl2N2O   |
| 312 | Fenazaquin                                | C20H22N2O      |
| 313 | Fenbuconazole                             | C19H17ClN4     |
| 314 | Fenclofos (Ronnell)                       | C8H8Cl3O3PS    |
| 315 | Fenfluoramine                             | C12H16F3N1     |
| 316 | Fenfuram                                  | C12H11NO2      |
| 317 | Fenhexamid                                | C14H17Cl2NO2   |
| 318 | Fenitrothion                              | C9H12NO5PS     |
| 319 | Fenobucarb                                | C12H17NO2      |
| 320 | Fenoprop (Silvex.2.4.5-TP)                | C9H7Cl3O3      |
| 321 | Fenoprop-methylester (Silvex-methylester) | C10H9Cl3O3     |
| 322 | Fenothiocab                               | C13H19NO2S     |
| 323 | Fenoxaprop-P                              | C16H12ClNO5    |
| 324 | Fenoxycarb                                | C17H19NO4      |
| 325 | Fenpiclonil                               | C11H6Cl2N2     |

|     |                            |                 |
|-----|----------------------------|-----------------|
| 326 | Fenpropathrin              | C22H23NO3       |
| 327 | Fenpropidin                | C19H31N         |
| 328 | Fenpropimorph              | C20H33NO        |
| 329 | Fenpyroximate              | C24H27N3O4      |
| 330 | Fenson                     | C12H9ClO3S      |
| 331 | Fensulfothion              | C11H17O4PS2     |
| 332 | Fensulfothion-sulfon       | C11H17O5PS2     |
| 333 | Fenthion                   | C10H15O3PS2     |
| 334 | Fenthion-oxon              | C10H15O4PS      |
| 335 | Fenthion-sulfon            | C10H15O5PS2     |
| 336 | Fenthion-sulfoxide         | C10H15O4PS2     |
| 337 | Triphenylstannylum         | C18H15Sn        |
| 338 | Fenuron                    | C9H12N2O        |
| 339 | Fenvalerate                | C25H22ClNO3     |
| 340 | Fipronil                   | C12H4Cl2F6N4OS  |
| 341 | Fipronil-desulfinyl        | C12H4Cl2F6N4    |
| 342 | Fipronil-sulfide           | C12H4Cl2F6N4S   |
| 343 | Fipronil-sulfone           | C12H4Cl2F6N4O2S |
| 344 | Flamprop                   | C16H13ClFNO3    |
| 345 | Flamprop-isopropyl         | C19H19ClFNO3    |
| 346 | Flazasulfuron              | C13H12F3N5O5S   |
| 347 | Flonicamid                 | C9H6F3N3O       |
| 348 | Florasulam                 | C12H8F3N5O3S    |
| 349 | Fluacrypyrim               | C20H21F3N2O5    |
| 350 | Fluazifop-p-butyl          | C19H20F3NO4     |
| 351 | Fluazinam                  | C13H4Cl2F6N4O4  |
| 352 | Fluazuron                  | C20H10Cl2F5N3O3 |
| 353 | Fluchloralin               | C12H13ClF3N3O4  |
| 354 | Fluconazole                | C13H12F2N6O     |
| 355 | Flucycloxuron              | C25H20ClF2N3O3  |
| 356 | Flucythrinate              | C26H23F2NO4     |
| 357 | Fludioxonil                | C12H6F2N2O2     |
| 358 | Flufenacet                 | C14H13F4N3O2S   |
| 359 | Flufenacet-ESA             | C11H14FNO4S     |
| 360 | Flufenacet-OXA             | C11H12FNO3      |
| 361 | Flufenoxuron               | C21H11ClF6N2O3  |
| 362 | Flufenazine (Diflovidazin) | C14H7F2ClN4     |
| 363 | Flumequine                 | C14H12FNO3      |
| 364 | Flumethrin                 | C28H22Cl2FNO3   |
| 365 | Flumetsulam                | C12H9F2N5O2S    |
| 366 | Flumioxazin                | C19H15FN2O4     |
| 367 | Fluometuron                | C10H11F3N2O     |
| 368 | Fluoroglycofen-ethyl       | C18H13ClF3NO7   |
| 369 | Fluoxastrobin              | C21H16ClFN4O5   |
| 370 | Fluquinconazole            | C16H8Cl2FN5O    |
| 371 | Fluridone                  | C19H14F3NO      |
| 372 | Flurochloridone            | C12H10Cl2F3NO   |
| 373 | Fluroxypyr                 | C7H5Cl2FN2O3    |
| 374 | Flurprimidol               | C15H15F3N2O2    |
| 375 | Flurtamone                 | C18H14F3NO2     |
| 376 | Flusilazole                | C16H15F2N3Si    |
| 377 | Flutolanil                 | C17H16F3NO2     |
| 378 | Flutriafol                 | C16H13F2N3O     |
| 379 | Fluvalinate (tau-)         | C26H22ClF3N2O3  |
| 380 | Fomesafen                  | C15H10ClF3N2O6S |
| 381 | Fonofos                    | C10H15OPS2      |
| 382 | Foramsulfuron              | C17H20N6O7S     |

|     |                                                |                |
|-----|------------------------------------------------|----------------|
| 383 | Forchlorfenuron                                | C12H10ClN3O    |
| 384 | Formetanate                                    | C11H15N3O2     |
| 385 | Fosthiazate                                    | C9H18NO3PS2    |
| 386 | Fuberidazole                                   | C11H8N2O       |
| 387 | Furalaxyl                                      | C17H19NO4      |
| 388 | Furathiocarb                                   | C18H26N2O5S    |
| 389 | Furilazole                                     | C11H13Cl2NO3   |
| 390 | Glufosinate                                    | C5H12NO4P      |
| 391 | Griseofulvin                                   | C17H17ClO6     |
| 392 | Halfenprox                                     | C24H23BrF2O3   |
| 393 | Halofenozide                                   | C18H19ClN2O2   |
| 394 | Haloxypop ethoxyethyl ester                    | C19H19ClF3NO5  |
| 395 | Heliotrine                                     | C16H27NO5      |
| 396 | Heliotrine-N-oxide                             | C16H27NO6      |
| 397 | Heptenophos                                    | C9H12ClO4P     |
| 398 | Hexaconazole                                   | C14H17Cl2N3O   |
| 399 | Hexaflumuron                                   | C16H8Cl2F6N2O3 |
| 400 | Hexazinone                                     | C12H20N4O2     |
| 401 | Hexythiazox                                    | C17H21ClN2O2S  |
| 402 | Imazalil                                       | C14H14Cl2N2O   |
| 403 | Imazamethabenz-methyl                          | C16H20N2O3     |
| 404 | Imazamox                                       | C15H19N3O4     |
| 405 | Imazapyr                                       | C13H15N3O3     |
| 406 | Imazaquin                                      | C17H17N3O3     |
| 407 | Imazethapyr                                    | C15H19N3O3     |
| 408 | Imazosulfuron                                  | C14H13ClN6O5S  |
| 409 | Imibenconazole                                 | C17H13Cl3N4S   |
| 410 | Imidacloprid                                   | C9H10ClN5O2    |
| 411 | Imidacloprid-guanidine                         | C9H12Cl2N4     |
| 412 | Imidacloprid-urea                              | C9H10ClN3O     |
| 413 | Imidocarb                                      | C19H20N6O      |
| 414 | Inabenfide                                     | C19H15ClN2O2   |
| 415 | Inabenfide                                     | C19H15ClN2O2   |
| 416 | Indoxacarb                                     | C22H17ClF3N3O7 |
| 417 | Iodofenphos (Jodfenphos)                       | C8H8Cl2IO3PS   |
| 418 | Ioxynil                                        | C7H3I2NO       |
| 419 | Iprobenfos                                     | C13H21O3PS     |
| 420 | Iprodione                                      | C13H13Cl2N3O3  |
| 421 | Iprovalicarb                                   | C18H28N2O3     |
| 422 | Irgarol                                        | C11H19N5S      |
| 423 | Irgarol-descyclopropyl                         | C8H15N5S       |
| 424 | Isazophos                                      | C9H17ClN3O3PS  |
| 425 | Isocarbamid (Azolamide)                        | C8H15N3O2      |
| 426 | Isocarbophos                                   | C11H16NO4PS    |
| 427 | Isoconazole                                    | C18H14Cl4N2O   |
| 428 | Isofenphos                                     | C15H24NO4PS    |
| 429 | Isofenphos-methyl                              | C14H22NO4PS    |
| 430 | Isoprocarb                                     | C11H15NO2      |
| 431 | Isopropalin                                    | C15H23N3O4     |
| 432 | Isoproturon                                    | C12H18N2O      |
| 433 | Isoproturon-didemethyl (1-(4-Isopropenyl)urea) | C10H14N2O      |
| 434 | Isoxaben                                       | C18H24N2O4     |
| 435 | Isoxadifen-ethyl                               | C18H17NO3      |
| 436 | Isoxaflutole                                   | C15H12F3NO4S   |
| 437 | Isoxathion                                     | C13H16NO4PS    |
| 438 | Ivermectin                                     | C48H74O14      |
| 439 | Kresoxim-methyl                                | C18H19NO4      |



|     |                                                 |                 |
|-----|-------------------------------------------------|-----------------|
| 440 | Lactofen                                        | C19H15ClF3NO7   |
| 441 | Lenacil                                         | C13H18N2O2      |
| 442 | Leptophos                                       | C13H10BrCl2O2PS |
| 443 | Lethane 384                                     | C9H17NO2S       |
| 444 | Linuron                                         | C9H10Cl2N2O2    |
| 445 | Lufenuron                                       | C17H8Cl2F8N2O3  |
| 446 | Malaoxon                                        | C10H19O7PS      |
| 447 | Malathion                                       | C10H19O6P1S2    |
| 448 | MCPA                                            | C9H9ClO3        |
| 449 | MCPB                                            | C11H13ClO3      |
| 450 | Mecarbam                                        | C10H20NO5PS2    |
| 451 | Mecoprop                                        | C10H11ClO3      |
| 452 | Mecoprop-methylester                            | C11H13ClO3      |
| 453 | Mefenacet                                       | C16H14N2O2S     |
| 454 | Mefenpyr-diethyl                                | C16H18Cl2N2O4   |
| 455 | Mefluidide                                      | C11H13F3N2O3S   |
| 456 | Melamine                                        | C3H6N6          |
| 457 | Mepanipyrim                                     | C14H13N3        |
| 458 | Mepronil                                        | C17H19NO2       |
| 459 | Mercaptobenzothiazole                           | C7H5NS2         |
| 460 | Mesotrion-MNBA                                  | C8H7NO6S        |
| 461 | Metalaxyl                                       | C15H21NO4       |
| 462 | Metamitron                                      | C10H10N4O       |
| 463 | Metaxalone                                      | C12H15NO3       |
| 464 | Metazachlor                                     | C14H16ClN3O     |
| 465 | Metazachlor-ESA                                 | C14H17N3O4S     |
| 466 | Metazachlor-OXA                                 | C14H15N3O3      |
| 467 | Metconazole                                     | C17H22ClN3O     |
| 468 | Methabenzthiazuron                              | C10H11N3OS      |
| 469 | Methacrifos                                     | C7H13O5PS       |
| 470 | Methamidophos                                   | C2H8NO2PS       |
| 471 | Methfuroxam                                     | C14H15NO2       |
| 472 | Methidathion                                    | C6H11N2O4PS3    |
| 473 | Methiocarb (Mercaptodimethur)                   | C11H15NO2S      |
| 474 | Methiocarb-sulfone                              | C11H15NO4S      |
| 475 | Methiocarb-sulfoxide                            | C11H15NO3S      |
| 476 | Methomyl                                        | C5H10N2O2S      |
| 477 | Methoprene                                      | C19H34O3        |
| 478 | Methoprotryne                                   | C11H21N5OS      |
| 479 | Methoxyfenozide                                 | C22H28N2O3      |
| 480 | Methyl 2-dimethoxyphosphinothioylsulfanylacetae | C5H11O4PS2      |
| 481 | Metobromuron                                    | C9H11BrN2O2     |
| 482 | Metolachlor                                     | C15H22ClNO2     |
| 483 | Metolachlor-ESA                                 | C15H23NO5S      |
| 484 | Metolachlor-morpholinon                         | C14H19NO2       |
| 485 | Metolachlor-OXA                                 | C15H21NO4       |
| 486 | Metolcarb                                       | C9H11NO2        |
| 487 | Metominostrobin (E-Isomer)                      | C16H16N2O3      |
| 488 | Metominostrobin (Z-Isomer)                      | C16H16N2O3      |
| 489 | Metosulam                                       | C14H13Cl2N5O4S  |
| 490 | Metoxuron                                       | C10H13ClN2O2    |
| 491 | Metrafenone                                     | C19H21BrO5      |

|     |                                                         |                |
|-----|---------------------------------------------------------|----------------|
| 492 | Metribuzin                                              | C8H14N4OS      |
| 493 | Metribuzin-Desamino (DA)                                | C8H13N3OS      |
| 494 | Metribuzin-Diketo (DK)                                  | C7H12N4O2      |
| 495 | Metsulfuron-methyl                                      | C14H15N5O6S    |
| 496 | Mevinphos                                               | C7H13O6P       |
| 497 | Mexacarbate                                             | C12H18N2O2     |
| 498 | MGK-264                                                 | C17H25NO2      |
| 499 | Molinate                                                | C9H17NOS       |
| 500 | Monocrotaline                                           | C16H23NO6      |
| 501 | Monocrotaline-N-oxide                                   | C16H23NO7      |
| 502 | Monocrotophos                                           | C7H14NO5P      |
| 503 | Monolinuron                                             | C9H11ClN2O2    |
| 504 | Monuron                                                 | C9H11ClN2O     |
| 505 | Morpholinon                                             | C14H19N1O2     |
| 506 | Myclobutanil                                            | C15H17ClN4     |
| 507 | N'-(2,4-Dimethylphenyl)-N-methylformamidine             | C10H14N2       |
| 508 | N,N-Dimethyl-N'-p-tolylsulphamide (DMST)                | C9H14N2O2S     |
| 509 | N-2,4-Dimethylphenylformamide (DMF, Amitraz Metabolite) | C9H11NO        |
| 510 | Naled                                                   | C4H7Br2Cl2O4P  |
| 511 | Naphthoxyaceticacid (beta-)                             | C12H10O2       |
| 512 | Napropamide                                             | C17H21NO2      |
| 513 | Naptalam (N-1-Naphthylphthalamicacid)                   | C18H13NO3      |
| 514 | Neburon                                                 | C12H16Cl2N2O   |
| 515 | Niclosamide                                             | C13H8Cl2N2O4   |
| 516 | Nicosulfuron                                            | C15H18N6O6S    |
| 517 | Nitenpyram                                              | C11H15ClN4O2   |
| 518 | Nitrofen                                                | C12H7Cl2NO3    |
| 519 | Nitrothal-isopropyl                                     | C14H17NO6      |
| 520 | Norflurazon                                             | C12H9ClF3N3O   |
| 521 | Novaluron                                               | C17H9ClF8N2O4  |
| 522 | Noviflumuron                                            | C17H7Cl2F9N2O3 |
| 523 | Nuarimol                                                | C17H12ClFN2O   |
| 524 | o,o,o-Triethylphosphorothioate                          | C6H15O3PS      |
| 525 | Ofurace                                                 | C14H16ClNO3    |
| 526 | Omethoate                                               | C5H12NO4PS     |
| 527 | Orbencarb                                               | C12H16ClNOS    |
| 528 | Oryzalin                                                | C12H18N4O6S    |
| 529 | Oxadiargyl                                              | C15H14Cl2N2O3  |
| 530 | Oxadiazon                                               | C15H18Cl2N2O3  |
| 531 | Oxadixyl                                                | C14H18N2O4     |
| 532 | Oxamyl                                                  | C7H13N3O3S     |
| 533 | Oxasulfuron                                             | C17H18N4O6S    |
| 534 | Oxfendazole                                             | C15H13N3O3S    |
| 535 | Oxybutynin                                              | C22H31NO3      |
| 536 | Oxycarboxin                                             | C12H13NO4S     |
| 537 | Oxydemeton-methyl                                       | C6H15O4PS2     |
| 538 | Oxyfluorfen                                             | C15H11ClF3NO4  |
| 539 | p,p-Dichlorobenzophenone                                | C13H8Cl2O      |
| 540 | Paclobutrazole                                          | C15H20ClN3O    |
| 541 | Paraoxon                                                | C10H14NO6P     |
| 542 | Paraoxon-methyl                                         | C8H10NO6P      |

|     |                                        |                |
|-----|----------------------------------------|----------------|
| 543 | Parathion                              | C10H14NO5PS    |
| 544 | Parathion-methyl                       | C8H10NO5PS     |
| 545 | PCP                                    | C6HCl5O        |
| 546 | Pebulate                               | C10H21NOS      |
| 547 | Penconazole                            | C13H15Cl2N3    |
| 548 | Pencycuron                             | C19H21ClN2O    |
| 549 | Pendimethalin                          | C13H19N3O4     |
| 550 | Penfluron                              | C15H9F5N2O2    |
| 551 | Pentanochlor                           | C13H18ClNO     |
| 552 | Permethrin                             | C21H20Cl2O3    |
| 553 | Pethoxamid                             | C16H22ClNO2    |
| 554 | Phenmedipham                           | C16H16N2O4     |
| 555 | Phenothrin (tech)                      | C23H26O3       |
| 556 | Phenthoate                             | C12H17O4PS2    |
| 557 | Phorate                                | C7H17O2PS3     |
| 558 | Phorate-oxon                           | C7H17O3PS2     |
| 559 | Phosalone                              | C12H15ClNO4PS2 |
| 560 | Phosmet                                | C11H12NO4PS2   |
| 561 | Phosphamidon (Dimecron)                | C10H19ClNO5P   |
| 562 | Phoxim                                 | C12H15N2O3PS   |
| 563 | P-Hydroxymesocarb                      | C18H18N4O3     |
| 564 | Picaridin (Icaridin)                   | C12H23NO3      |
| 565 | Picloram                               | C6H3Cl3N2O2    |
| 566 | Picolinafen                            | C19H12F4N2O2   |
| 567 | Piperazine                             | C4H10N2        |
| 568 | Piperonylbutoxide                      | C19H30O5       |
| 569 | Pirimicarb                             | C11H18N4O2     |
| 570 | Pirimicarb-desmethyl                   | C10H16N4O2     |
| 571 | Pirimiphos-ethyl                       | C13H24N3O3PS   |
| 572 | Pirimiphos-methyl                      | C11H20N3O3PS   |
| 573 | Pretilachlor                           | C17H26ClNO2    |
| 574 | Prochloraz                             | C15H16Cl3N3O2  |
| 575 | Procymidone                            | C13H11Cl2NO2   |
| 576 | Profenophos                            | C11H15BrClO3PS |
| 577 | Profoxydim                             | C24H32ClNO4S   |
| 578 | Proguanil                              | C11H16N5Cl     |
| 579 | Prohexadione                           | C10H12O5       |
| 580 | Promecarb                              | C12H17NO2      |
| 581 | Prometon                               | C10H19N5O      |
| 582 | Prometryn                              | C10H19N5S      |
| 583 | Propachlor                             | C11H14ClNO     |
| 584 | Propachlor-ESA                         | C11H15NO4S     |
| 585 | Propachlor-OXA                         | C11H13NO3      |
| 586 | Propamocarb                            | C9H20N2O2      |
| 587 | Propanil                               | C9H9Cl2NO      |
| 588 | Propaphos                              | C13H21O4PS     |
| 589 | Propaquizafop                          | C22H22ClN3O5   |
| 590 | Propargite                             | C19H26O4S      |
| 591 | Propazine                              | C9H16ClN5      |
| 592 | Propazine-2-hydroxy (Prometon-Hydroxy) | C9H17N5O       |
| 593 | Propetamphos                           | C10H20NO4PS    |

|     |                          |                 |
|-----|--------------------------|-----------------|
| 594 | Propham                  | C10H13NO2       |
| 595 | Propiconazole            | C15H17Cl2N3O2   |
| 596 | Propoxur                 | C11H15NO3       |
| 597 | Propyzamide (Pronamide)  | C12H11Cl2NO     |
| 598 | Proquinazid              | C14H17IN2O2     |
| 599 | Prosulfocarb             | C14H21NOS       |
| 600 | Prosulfuron              | C15H16F3N5O4S   |
| 601 | Prothioconazole          | C14H15Cl2N3OS   |
| 602 | Prothioconazole-desethio | C14H15Cl2N3O    |
| 603 | Pymetrozine              | C10H11N5O       |
| 604 | Pyraclostrobin           | C19H18ClN3O4    |
| 605 | Pyraflufen-ethyl         | C15H13Cl2F3N2O4 |
| 606 | Pyrazophos               | C14H20N3O5PS    |
| 607 | Pyrazoxyfen              | C20H16Cl2N2O3   |
| 608 | Pyrethrin                | C21H28O3        |
| 609 | Pyrethrins: Cinerin      | C20H28O3        |
| 610 | Pyrethrins: Jasmolin     | C21H30O3        |
| 611 | Pyributicarb             | C18H22N2O2S     |
| 612 | Pyridaben                | C19H25ClN2OS    |
| 613 | Pyridaphenthion          | C14H17N2O4PS    |
| 614 | Pyridate                 | C19H23ClN2O2S   |
| 615 | Pyrifenox                | C14H12Cl2N2O    |
| 616 | Pyrimethanil             | C12H13N3        |
| 617 | Pyrimidifen              | C20H28ClN3O2    |
| 618 | Pyriproxyfen             | C20H19NO3       |
| 619 | Quinalphos               | C12H15N2O3PS    |
| 620 | Quinclorac               | C10H5Cl2NO2     |
| 621 | Quinmerac                | C11H8ClNO2      |
| 622 | Quinoxiphen              | C15H8Cl2FNO     |
| 623 | Quizalofop               | C17H13ClN2O4    |
| 624 | Quizalofop-ethyl         | C19H17ClN2O4    |
| 625 | Rabenzazole              | C12H12N4        |
| 626 | Resmethrin               | C22H26O3        |
| 627 | Resmethrin               | C22H26O3        |
| 628 | Retrorsine               | C18H25NO6       |
| 629 | Retrorsine-N-oxide       | C18H25NO7       |
| 630 | Rimsulfuron              | C14H17N5O7S2    |
| 631 | Rotenone                 | C23H22O6        |
| 632 | Schradan                 | C8H24N4O3P2     |
| 633 | Sebuthylazine            | C9H16ClN5       |
| 634 | Secbumeton               | C10H19N5O       |
| 635 | Senecionine              | C18H25NO5       |
| 636 | Senecionine-N-oxide      | C18H25NO6       |
| 637 | Senkirkine               | C19H27NO6       |
| 638 | Sethoxydim               | C17H29NO3S      |
| 639 | Siduron                  | C14H20N2O       |
| 640 | Simazine                 | C7H12ClN5       |
| 641 | Simazine 2-Hydroxy       | C7H13N5O        |
| 642 | Simetryn                 | C8H15N5S        |
| 643 | Spinosad A (Spinosyn A)  | C41H65NO10      |
| 644 | Spinosad D               | C42H67NO10      |

|     |                                   |                |
|-----|-----------------------------------|----------------|
| 645 | Spinosyn B or K                   | C40H63NO10     |
| 646 | Spirodiclofen                     | C21H24Cl2O4    |
| 647 | Spiromesifen                      | C23H30O4       |
| 648 | Spiroxamine                       | C18H35NO2      |
| 649 | Strychnine                        | C21H22N2O2     |
| 650 | Sulcotrione                       | C14H13ClO5S    |
| 651 | Sulfometuron-methyl               | C15H16N4O5S    |
| 652 | Sulfotepp                         | C8H20O5P2S2    |
| 653 | Sulprofos (Bolstar)               | C12H19O2PS3    |
| 654 | SWEP.MCC                          | C8H7Cl2NO2     |
| 655 | TCMTB                             | C9H6N2S3       |
| 656 | Tebuconazole                      | C16H22ClN3O    |
| 657 | Tebufenozide                      | C22H28N2O2     |
| 658 | Tebupirimphos                     | C13H23N2O3PS   |
| 659 | Tebutame                          | C15H23NO       |
| 660 | Tebuthiuron                       | C9H16N4OS      |
| 661 | Teflubenzuron                     | C14H6Cl2F4N2O2 |
| 662 | Tefluthrin                        | C17H14ClF7O2   |
| 663 | Temephos                          | C16H20O6P2S3   |
| 664 | TEPP                              | C8H20O7P2      |
| 665 | Tepraloxymid                      | C17H24ClNO4    |
| 666 | Terbacil                          | C9H13ClN2O2    |
| 667 | Terbufos                          | C9H21O2PS3     |
| 668 | Terbufos-sulfone                  | C9H21O4PS3     |
| 669 | Terbufos-sulfoxide                | C9H21O3PS3     |
| 670 | Terbumeton                        | C10H19N5O      |
| 671 | Terbuthylazine                    | C9H16ClN5      |
| 672 | Terbuthylazine-2-hydroxy          | C9H17N5O       |
| 673 | Terbuthylazine-desethyl           | C7H12ClN5      |
| 674 | Terbuthylazine-desethyl-2-hydroxy | C7H13N5O       |
| 675 | Terbutryn                         | C10H19N5S      |
| 676 | Tetrachlorvinphos (Stirofos)      | C10H9Cl4O4P    |
| 677 | Tetraconazole                     | C13H11Cl2F4N3O |
| 678 | Tetradifon                        | C12H6Cl4O2S    |
| 679 | Tetramethrin                      | C19H25NO4      |
| 680 | Thenylchlor                       | C16H18ClNO2S   |
| 681 | Thiabendazole                     | C10H7N3S       |
| 682 | Thiacloprid                       | C10H9ClN4S     |
| 683 | Thiacloprid-amide                 | C10H11ClN4OS   |
| 684 | Thiamethoxam                      | C8H10ClN5O3S   |
| 685 | Thiazopyr                         | C16H17F5N2O2S  |
| 686 | Thidiazuron                       | C9H8N4OS       |
| 687 | Thifensulfuron-methyl             | C12H13N5O6S2   |
| 688 | Thiobencarb                       | C12H16ClNOS    |
| 689 | Thiocyclam                        | C5H11NS3       |
| 690 | Thiodicarb                        | C10H18N4O4S3   |
| 691 | Thiofanox                         | C9H18N2O2S     |
| 692 | Thiometon                         | C6H15O2PS3     |
| 693 | Thionazin (Zinophos)              | C8H13N2O3PS    |
| 694 | Thiophanate-methyl                | C12H14N4O4S2   |
| 695 | Thiophanat-ethyl                  | C14H18N4O4S2   |

|     |                                            |                  |
|-----|--------------------------------------------|------------------|
| 696 | Thiram (Tetramethylthiuramdisulfide, TMTD) | C6H12N2S4        |
| 697 | Tinidazole                                 | C8H13N3O4S       |
| 698 | Tiocarbazil                                | C16H25NOS        |
| 699 | Tokuthion (Prothiophos)                    | C11H15Cl2O2PS2   |
| 700 | Tolclofos-methyl                           | C9H11Cl2O3PS     |
| 701 | Tolfenpyrad                                | C21H22ClN3O2     |
| 702 | Tolnaftate                                 | C19H17NOS        |
| 703 | Tolyfluanid                                | C10H13Cl2FN2O2S2 |
| 704 | Tralkoxydim                                | C20H27NO3        |
| 705 | Tralomethrin                               | C22H19Br4NO3     |
| 706 | Tranexamic acid                            | C8H15NO2         |
| 707 | Triadimefon                                | C14H16ClN3O2     |
| 708 | Triadimenol                                | C14H18ClN3O2     |
| 709 | Triallate                                  | C10H16Cl3NOS     |
| 710 | Triasulfuron                               | C14H16ClN5O5S    |
| 711 | Triazamate                                 | C13H22N4O3S      |
| 712 | Triazophos                                 | C12H16N3O3PS     |
| 713 | Triazoxide                                 | C10H6ClN5O       |
| 714 | Tribenuron-methyl                          | C15H17N5O6S      |
| 715 | Tribufos (Merphos oxide. DEF)              | C12H27OPS3       |
| 716 | Trichlorfon (Dylox)                        | C4H8Cl3O4P       |
| 717 | Trichloronate                              | C10H12Cl3O2PS    |
| 718 | Triclabendazole                            | C14H9Cl3N2OS     |
| 719 | Triclocarban                               | C13H9Cl3N2O      |
| 720 | Triclopyr                                  | C7H4Cl3NO3       |
| 721 | Triclopyr-methylester                      | C8H6Cl3NO3       |
| 722 | Tricyclazole                               | C9H7N3S          |
| 723 | Trietazine                                 | C9H16ClN5        |
| 724 | Trifloxystrobin                            | C20H19F3N2O4     |
| 725 | Trifloxysulfuron                           | C14H14F3N5O6S    |
| 726 | Triflumizole                               | C15H15ClF3N3O    |
| 727 | Triflumuron                                | C15H10ClF3N2O3   |
| 728 | Triflusulfuron-methyl                      | C17H19F3N6O6S    |
| 729 | Triforine                                  | C10H14Cl6N4O2    |
| 730 | Trimethacarb (2,3,5-)                      | C11H15NO2        |
| 731 | Trimethacarb (3,4,5-)                      | C11H15NO2        |
| 732 | Trinexapac acid                            | C11H12O5         |
| 733 | Trinexapac-ethyl                           | C13H16O5         |
| 734 | Triphenylphosphate                         | C18H15O4P        |
| 735 | Triticonazole                              | C17H20ClN3O      |
| 736 | Uniconazole                                | C15H18ClN3O      |
| 737 | Vamidothion                                | C8H18NO4PS2      |
| 738 | Vegadex (Sulfallate)                       | C8H14ClNS2       |
| 739 | Vernolate                                  | C10H21NOS        |
| 740 | Warfarin                                   | C19H16O4         |
| 741 | XMC                                        | C10H13NO2        |
| 742 | Zoxamide                                   | C14H16Cl3NO2     |

**Table S2.** Wastewater concentrations (ng/L), standard deviations (SD) and frequency of detection (DF) of pesticides and their transformation products and/or metabolites (TP/M) in influent wastewater in 2014 of Athens, Greece.

| Analyte                           | Polarity | Mean  | SD   | Median | Min. | Max.  | DF  | Pesticide class           |
|-----------------------------------|----------|-------|------|--------|------|-------|-----|---------------------------|
| Ametryn                           | +        | 9.2   | 1.1  | 10     | 8.3  | 11.3  | 8/8 | herbicide                 |
| Amitrole                          | +        | 554   | 21   | 524    | 351  | 973   | 7/8 | herbicide                 |
| Atrazine-desethyl                 | +        | 176   | 16   | 166    | 126  | 275   | 8/8 | TP/M                      |
| Atrazine-desisopropyl             | +        | 217   | 17   | 196    | 164  | 313   | 5/8 | TP/M                      |
| Azoxystrobin                      | +        | 7.04  | 0.38 | 7      | 3.83 | 11.07 | 4/8 | fungicide                 |
| Azoxystrobin acid                 | +        | 72.0  | 46.0 | 74.5   | 13   | 127   | 8/8 | TP/M                      |
| Carbofuran-3-hydroxy              | +        | 19.8  | 3.0  | 20     | 16   | 22    | 8/8 | TP/M                      |
| Climbazole                        | +        | 790   | 670  | 800    | 150  | 2000  | 8/8 | fungicide                 |
| DEET (Diethyltoluamide)           | +        | 58.1  | 35.0 | 55.2   | 25.0 | 110   | 8/8 | insect repellent          |
| Difenoconazole                    | +        | 31.2  | 33   | 32.1   | 5.0  | 82.1  | 5/8 | fungicide                 |
| Dimethachlor-ESA                  | +        | 2500  | 650  | 2440   | 1800 | 3700  | 8/8 | TP/M                      |
| Dimethoate                        | +        | 70    | 56   | 72     | 32   | 150   | 4/8 | insecticide,<br>acaricide |
| Fluconazole                       | +        | 150   | 70   | 155    | 88   | 260   | 8/8 | fungicide                 |
| Flutolanil                        | +        | 6.1   | 2.0  | 7.1    | 3.0  | 9.0   | 8/8 | fungicide                 |
| Metalaxyl                         | +        | 76.0  | 12.0 | 77.1   | 3.0  | 320   | 6/8 | fungicide                 |
| Metolachlor                       | +        | 13.1  | 13   | 13.0   | 1    | 28    | 8/8 | herbicide                 |
| Metolachlor-morpholinon           | +        | 12.62 | 0.31 | 14     | 8.81 | 18.2  | 7/8 | TP/M                      |
| Penconazole                       | +        | 33.1  | 34.0 | 35.0   | 4.0  | 100   | 8/8 | fungicide                 |
| Phthalate-dimethyl                | +        | 43.8  | 3.8  | 40     | 33.9 | 64.4  | 8/8 | insect repellent          |
| Picaridin (Icaridin)              | +        | 27.1  | 9.0  | 25.6   | 20.1 | 43.2  | 5/8 | insect repellent          |
| Terbacil                          | +        | 1135  | 111  | 1156   | 967  | 1282  | 8/8 | herbicide                 |
| Dinoterb                          | -        | 23    | 25   | 24     | 5    | 73    | 8/8 | herbicide                 |
| Fipronil                          | -        | 12    | 4.0  | 11.3   | 7    | 19    | 8/8 | insecticide               |
| Fludioxonil                       | -        | 6.2   | 6.0  | 6.5    | 2.0  | 20.1  | 8/8 | fungicide                 |
| cis-1,2,3,6-Tetrahydrophthalimide | -        | 3379  | 358  | 3695   | 1309 | 4438  | 8/8 | TP/M                      |

**Table S3.** Wastewater concentrations (ng/L), standard deviations (SD) and frequency of detection (DF) of pesticides and their transformation products and/or metabolites (TP/M) in influent wastewater in 2015 of Athens, Greece.

| Analyte                           | Polarity | Mean  | SD   | Median | Min.  | Max.  | DF  | Pesticide class        |
|-----------------------------------|----------|-------|------|--------|-------|-------|-----|------------------------|
| Amitrole                          | +        | 588   | 61   | 589    | 483   | 689   | 8/8 | herbicide              |
| Anabasine                         | +        | 2338  | 157  | 2385   | 1873  | 2684  | 8/8 | insecticide            |
| Azoxystrobin                      | +        | 178   | 22   | 68     | 17    | 478   | 7/8 | fungicide              |
| Azoxystrobin acid                 | +        | 85.4  | 7.3  | 85.1   | 25.2  | 169.0 | 5/8 | TP/M                   |
| Carbendazim                       | +        | 16.0  | 9.1  | 14.5   | 10    | 34    | 8/8 | fungicide              |
| Carbofuran-3-hydroxy              | +        | 48.8  | 4.0  | 48.5   | 40.6  | 57.7  | 8/8 | TP/M                   |
| Carboxin                          | +        | 7.52  | 0.90 | 7.56   | 3.67  | 9.17  | 8/8 | fungicide              |
| Climbazole                        | +        | 159   | 17   | 137    | 102   | 271   | 8/8 | fungicide              |
| Cyproconazole                     | +        | 351.1 |      |        |       |       | 1/8 | fungicide              |
| Cyprodinil                        | +        | 7.2   | 1.1  | 7.7    | 3.6   | 10.8  | 8/8 | fungicide              |
| DEET (Diethyltoluamide)           | +        | 64.3  | 5.8  | 55.4   | 42.8  | 112.8 | 8/8 | insect repellent       |
| Difenoconazole                    | +        | 37.9  | 5.7  | 32.3   | 24.3  | 57.1  | 3/8 | fungicide              |
| Fluconazole                       | +        | 95    | 14   | 95     | 65    | 124   | 8/8 | fungicide              |
| Fluometuron                       | +        | 99    | 11   | 39     | 24    | 234   | 3/8 | herbicide              |
| Flutolanil                        | +        | 71.3  | 6.5  | 71.0   | 55.2  | 83.5  | 5/8 | fungicide              |
| Irgarol                           | +        | 2.58  | 0.27 | 2.70   | 1.60  | 3.11  | 8/8 | herbicide              |
| Metalaxyl                         | +        | 22.46 | 0.56 | 17.61  | 16.82 | 32.95 | 3/8 | fungicide              |
| Metolachlor                       | +        | 27.2  | 2.6  | 13.3   | 8.4   | 89.1  | 7/8 | herbicide              |
| Phthalate-dimethyl                | +        | 41.7  | 3.2  | 37.7   | 21.2  | 76.0  | 7/8 | insect repellent       |
| Picaridin (Icaridin)              | +        | 36.2  | 3.3  | 35.9   | 27.6  | 45.1  | 8/8 | insect repellent       |
| Prohexadione                      | +        | 121   | 18   | 124    | 30    | 185   | 6/8 | plant growth regulator |
| Sethoxydim                        | +        | 1089  | 76   | 1109   | 860   | 1233  | 5/8 | herbicide              |
| Tralkoxydim                       | +        | 4885  | 630  | 4789   | 3782  | 6006  | 8/8 | herbicide              |
| Dinoterb                          | -        | 26.4  | 1.2  | 26.4   | 25.5  | 27.3  | 2/8 | herbicide              |
| cis-1,2,3,6-Tetrahydrophthalimide | -        | 1256  | 118  | 1280   | 788   | 1760  | 8/8 | TP/M                   |



**Table S4.** Wastewater concentrations (ng/L), standard deviations (SD) and frequency of detection (DF) of pesticides and their transformation products and/or metabolites (TP/M) in influent wastewater in 2016 of Athens, Greece.

| Analyte                           | Polarity | Mean  | SD   | Median | Min.  | Max.   | DF  | Pesticide class            |
|-----------------------------------|----------|-------|------|--------|-------|--------|-----|----------------------------|
| Amitrole                          | +        | 849   | 85   | 849    | 706   | 976    | 8/8 | herbicide                  |
| Anabasine                         | +        | 3641  | 317  | 3430   | 2588  | 5655   | 8/8 | insecticide                |
| Asulam                            | +        | 669   | 64   | 696    | 455   | 790    | 6/8 | herbicide                  |
| Azoxystrobin                      | +        | 71.1  | 5.0  | 75.8   | 39.8  | 107.5  | 6/8 | fungicide                  |
| Azoxystrobin acid                 | +        | 25.1  | 2.8  | 26.0   | 14.1  | 30.4   | 6/8 | TP/M                       |
| Carbendazim                       | +        | 6.31  | 0.80 | 5.4    | 4.1   | 12.2   | 8/8 | fungicide                  |
| Carbofuran-3-hydroxy              | +        | 97.1  | 2.8  | 95.8   | 94.7  | 103.1  | 8/8 | TP/M                       |
| Climbazole                        | +        | 157.4 | 3.9  | 140.9  | 61.6  | 409.6  | 8/8 | fungicide                  |
| Cyprodinil                        | +        | 10.0  | 1.2  | 10.9   | 1.4   | 13.3   | 8/8 | fungicide                  |
| DEET (Diethyltoluamide)           | +        | 133.8 | 5.5  | 130.8  | 58.2  | 240.2  | 8/8 | insect repellent           |
| Difenoconazole                    | +        | 41.3  | 4.3  | 23.3   | 17.2  | 83.3   | 3/8 | fungicide                  |
| Dimethachlor-ESA                  | +        | 1222  | 167  | 1154   | 945   | 1589   | 8/8 | TP/M                       |
| Dimethoate                        | +        | 15.9  | 1.7  | 9.6    | 3.2   | 65.8   | 7/8 | insecticide,<br>acaricide  |
| Fenamiphos                        | +        | 367.0 | 8.5  | 144.6  | 132.6 | 823.9  | 3/8 | insecticide,<br>nematicide |
| Fluconazole                       | +        | 156   | 11   | 156    | 135   | 170    | 8/8 | fungicide                  |
| Fluometuron                       | +        | 38.6  | 2.3  | 17.3   | 12.7  | 132.2  | 8/8 | herbicide                  |
| Metolachlor                       | +        | 4848  | 197  | 2353   | 2059  | 10,533 | 6/8 | herbicide                  |
| Metolachlor-morpholinon           | +        | 1986  | 129  | 1792   | 290   | 3304   | 4/8 | TP/M                       |
| Penconazole                       | +        | 8.50  | 0.53 | 8.17   | 4.91  | 13.94  | 5/8 | fungicide                  |
| Picaridin (Icaridin)              | +        | 40.0  | 4.3  | 38.8   | 29.9  | 49.6   | 8/8 | insect repellent           |
| Prohexadione                      | +        | 59.2  | 3.8  | 46.0   | 42.2  | 92.0   | 7/8 | plant growth<br>regulator  |
| Propiconazole                     | +        | 66.5  | 3.9  | 74.1   | 47.7  | 81.8   | 5/8 | fungicide                  |
| Terbutryn                         | +        | 12.04 | 0.45 | 14.21  | 3.03  | 16.70  | 4/8 | herbicide                  |
| Thiamethoxam                      | +        | 119   | 18   | 121    | 100   | 135    | 3/8 | insecticide                |
| Thiodicarb                        | +        | 8.45  | 0.20 | 7.06   | 6.78  | 11.53  | 3/8 | insecticide                |
| Tralkoxydim                       | +        | 4669  | 274  | 4709   | 4096  | 4906   | 8/8 | herbicide                  |
| Fipronil                          | -        | 117   | 12   | 103    | 86    | 241    | 8/8 | insecticide                |
| Fludioxonil                       | -        | 29.0  | 4.0  | 29.8   | 9.6   | 59.6   | 8/8 | fungicide                  |
| cis-1,2,3,6-Tetrahydrophthalimide | -        | 1597  | 106  | 1610   | 1398  | 1719   | 8/8 | TP/M                       |

**Table S5.** Wastewater concentrations (ng/L), standard deviations (SD) and frequency of detection (DF) of pesticides and their transformation products and/or metabolites (TP/M) in influent wastewater in 2017 of Athens, Greece.

| Analyte                                   | Polarity | Mean   | SD   | Median | Min.  | Max.   | DF  | Pesticide class           |
|-------------------------------------------|----------|--------|------|--------|-------|--------|-----|---------------------------|
| Amitrole                                  | +        | 535    | 60   | 571    | 411   | 610    | 7/7 | herbicide                 |
| Anabasine                                 | +        | 1930   | 186  | 1928   | 1389  | 2235   | 6/7 | insecticide               |
| Asulam                                    | +        | 552    | 65   | 553    | 458   | 644    | 3/7 | herbicide                 |
| Azoxystrobin                              | +        | 265    | 16   | 127    | 45    | 776    | 6/7 | fungicide                 |
| Carbendazim                               | +        | 72.4   |      |        |       |        | 1/7 | fungicide                 |
| Carbofuran-3-hydroxy                      | +        | 66.4   | 7.0  | 72.2   | 31.8  | 85.9   | 7/7 | TP/M                      |
| Climbazole                                | +        | 277    | 14   | 226    | 197   | 415    | 7/7 | fungicide                 |
| Cyprodinil                                | +        | 15.0   | 1.5  | 9.3    | 6.9   | 46.7   | 7/7 | fungicide                 |
| DEET (Diethyltoluamide)                   | +        | 74.6   | 9.4  | 56.3   | 34.0  | 162.3  | 7/7 | insect repellent          |
| Difenoconazole                            | +        | 144.83 | 0.58 | 62.38  | 29.54 | 425.02 | 4/7 | fungicide                 |
| Dimethachlor-ESA                          | +        | 520    | 26   | 547    | 136   | 746    | 7/7 | TP/M                      |
| Fluometuron                               | +        | 127    | 13   | 115    | 96    | 187    | 5/7 | herbicide                 |
| Metolachlor                               | +        | 63.2   | 9.2  | 46.4   | 28.4  | 145.7  | 7/7 | herbicide                 |
| Phthalate-dimethyl                        | +        | 87     | 10   | 85     | 50    | 144    | 7/7 | insect repellent          |
| Picaridin (Icaridin)                      | +        | 24.9   | 3.0  | 25.6   | 17.7  | 34.2   | 7/7 | insect repellent          |
| Pirimiphos-methyl                         | +        | 7.18   | 0.49 | 5.67   | 3.66  | 13.72  | 4/7 | insecticide,<br>acaricide |
| Tebuconazole                              | +        | 44.8   | 1.7  | 44.8   | 43.7  | 46.0   | 2/7 | fungicide                 |
| Terbutryn                                 | +        | 5.45   | 0.45 | 5.45   | 5.13  | 5.77   | 2/7 | herbicide                 |
| Thiodicarb                                | +        | 415    | 49   | 411    | 325   | 545    | 7/7 | insecticide               |
| Tralkoxydim                               | +        | 2689   | 286  | 2695   | 2078  | 3434   | 7/7 | herbicide                 |
| <i>cis</i> -1,2,3,6-Tetrahydrophthalimide | -        | 1621   | 169  | 1841   | 618   | 1926   | 7/7 | TP/M                      |

**Table S6.** Wastewater concentrations (ng/L), standard deviations (SD) and frequency of detection (DF) of pesticides and their transformation products and/or metabolites (TP/M) in influent wastewater in 2018 of Athens, Greece.

| Analyte                           | Polarity | Mean  | SD   | Median | Min.  | Max.  | DF  | Pesticide class        |
|-----------------------------------|----------|-------|------|--------|-------|-------|-----|------------------------|
| Amitrole                          | +        | 864   | 102  | 873    | 733   | 971   | 6/7 | herbicide              |
| Azoxystrobin                      | +        | 1042  | 39   | 955    | 856   | 1269  | 5/7 | fungicide              |
| Azoxystrobin acid                 | +        | 367   | 21   | 240    | 142   | 975   | 5/7 | TP/M                   |
| Carbendazim                       | +        | 2.30  | 0.16 | 8.38   | 7.05  | 14.40 | 7/7 | fungicide              |
| Carbofuran-3-hydroxy              | +        | 202   | 18   | 195    | 189   | 237   | 6/7 | TP/M                   |
| Climbazole                        | +        | 644   | 49   | 622    | 413   | 882   | 7/7 | fungicide              |
| Cyproconazole                     | +        | 204   | 25   | 165    | 115   | 428   | 5/7 | fungicide              |
| Cyprodinil                        | +        | 11.72 | 0.32 | 12.14  | 8.49  | 14.49 | 6/7 | fungicide              |
| DEET (Diethyltoluamide)           | +        | 92.8  | 6.3  | 97.3   | 60.2  | 134.8 | 6/7 | insect repellent       |
| Difenoconazole                    | +        | 131   | 19   | 109    | 44    | 334   | 7/7 | fungicide              |
| Dimethachlor-ESA                  | +        | 937   | 81   | 963    | 759   | 1119  | 6/7 | TP/M                   |
| Fluconazole                       | +        | 292   | 24   | 274    | 195   | 514   | 7/7 | fungicide              |
| Fluometuron                       | +        | 68.9  | 6.8  | 71.3   | 51.6  | 81.4  | 4/7 | herbicide              |
| Metolachlor                       | +        | 2655  | 387  | 2777   | 840   | 4225  | 4/7 | herbicide              |
| Metolachlor-morpholinon           | +        | 32.19 | 0.75 | 29.09  | 18.99 | 51.59 | 4/7 | TP/M                   |
| Napropamide                       | +        | 37.7  | 5.0  | 35.5   | 24.7  | 53.8  | 7/7 | herbicide              |
| Nicosulfuron                      | +        | 642   | 46   | 680    | 501   | 745   | 3/7 | herbicide              |
| Penconazole                       | +        | 85.0  | 6.9  | 98.3   | 17.1  | 148.9 | 6/7 | fungicide              |
| Phthalate-dimethyl                | +        | 225   | 29   | 225    | 98    | 354   | 5/7 | insect repellent       |
| Prohexadione                      | +        | 271   | 40   | 290    | 175   | 368   | 5/7 | plant growth regulator |
| Propamocarb                       | +        | 13.7  | 2.2  | 15.6   | 5.7   | 19.3  | 7/7 | fungicide              |
| Sethoxydim                        | +        | 1645  | 161  | 1634   | 1442  | 1877  | 6/7 | herbicide              |
| Thiamethoxam                      | +        | 210   | 14   | 189    | 76    | 401   | 6/7 | insecticide            |
| Tralkoxydim                       | +        | 2990  | 140  | 3079   | 2567  | 3305  | 6/7 | herbicide              |
| Fipronil                          | -        | 111   | 12   | 113    | 89    | 128   | 7/7 | insecticide            |
| Fludioxonil                       | -        | 6.55  | 0.89 | 6.27   | 5.35  | 8.15  | 5/7 | fungicide              |
| Dinoterb                          | -        | 143.3 | 3.3  | 122.4  | 41.1  | 211.0 | 7/7 | herbicide              |
| cis-1,2,3,6-Tetrahydrophthalimide | -        | 3344  | 238  | 3372   | 2917  | 3567  | 6/7 | TP/M                   |

**Table S7.** Wastewater concentrations (ng/L), standard deviations (SD) and frequency of detection (DF) of pesticides and their transformation products and/or metabolites (TP/M) in influent wastewater in 2019 of Athens, Greece.

| Analyte                                   | Polarity | Mean  | SD   | Median | Min.  | Max.  | DF  | Pesticide class  |
|-------------------------------------------|----------|-------|------|--------|-------|-------|-----|------------------|
| Acetochlor                                | +        | 89.6  | 9.2  | 85.8   | 65.7  | 120.1 | 7/7 | herbicide        |
| Amitrole                                  | +        | 193.6 | 3.2  | 176.9  | 112.5 | 266.0 | 7/7 | herbicide        |
| Azoxystrobin                              | +        | 16.5  | 1.4  | 9.0    | 3.7   | 35.9  | 6/7 | fungicide        |
| Carbofuran-3-hydroxy                      | +        | 69.5  | 9.7  | 70.3   | 39.4  | 89.0  | 7/7 | TP/M             |
| Carboxin                                  | +        | 1407  | 168  | 1583   | 819   | 1820  | 3/7 | fungicide        |
| Climbazole                                | +        | 43.7  | 7.4  | 43.5   | 20.8  | 65.6  | 7/7 | fungicide        |
| DEET (Diethyltoluamide)                   | +        | 34.0  | 8.3  | 24.8   | 11.0  | 93.5  | 6/7 | insect repellent |
| Difenoconazole                            | +        | 90.3  | 6.3  | 68.2   | 59.3  | 143.5 | 3/7 | fungicide        |
| Dimethachlor-ESA                          | +        | 239.0 | 9.5  | 248.3  | 111.3 | 415.0 | 7/7 | TP/M             |
| Fluconazole                               | +        | 33.0  | 3.2  | 33.3   | 26.6  | 39.0  | 7/7 | fungicide        |
| Fluometuron                               | +        | 5.22  | 0.23 | 5.19   | 3.20  | 8.69  | 5/7 | herbicide        |
| Metolachlor                               | +        | 32.7  | 1.4  | 26.1   | 8.4   | 74.5  | 5/7 | herbicide        |
| Penconazole                               | +        | 8.09  |      |        |       |       | 1/7 | fungicide        |
| Picaridin (Icaridin)                      | +        | 6.14  | 0.55 | 4.75   | 3.59  | 11.66 | 7/7 | insect repellent |
| Propachlor-OXA                            | +        | 21.5  | 2.7  | 21.8   | 14.3  | 26.4  | 7/7 | TP/M             |
| Sethoxydim                                | +        | 377.3 | 55.3 | 348.8  | 272.5 | 485.4 | 7/7 | herbicide        |
| Tralkoxydim                               | +        | 670   | 38   | 644    | 380   | 919   | 7/7 | herbicide        |
| <i>cis</i> -1,2,3,6-Tetrahydrophthalimide | -        | 319   | 33   | 322    | 102   | 554   | 7/7 | TP/M             |

**Table S8.** Wastewater concentrations (ng/L), standard deviations (SD) and frequency of detection (DF) of pesticides and their transformation products and/or metabolites (TP/M) in influent wastewater in 2020 of Athens, Greece.

| Analyte                           | Polarity | Mean  | SD   | Median | Min.  | Max.  | DF  | Pesticide class           |
|-----------------------------------|----------|-------|------|--------|-------|-------|-----|---------------------------|
| Amitrole                          | +        | 168   | 15   | 131    | 85    | 414   | 7/7 | herbicide                 |
| Asulam                            | +        | 11.6  | 1.2  | 12.0   | 6.5   | 14.1  | 5/7 | herbicide                 |
| Atrazine-desisopropyl             | +        | 19.4  | 2.0  | 20.8   | 13.9  | 23.8  | 7/7 | TP/M                      |
| Azoxystrobin                      | +        | 107.2 | 4.4  | 69.2   | 12.2  | 258.0 | 6/7 | fungicide                 |
| Carbendazim                       | +        | 6.60  | 0.48 | 2.91   | 2.48  | 18.09 | 4/7 | fungicide                 |
| Carbofuran-3-hydroxy              | +        | 75    | 11   | 75     | 48    | 116   | 7/7 | TP/M                      |
| Climbazole                        | +        | 37.2  | 2.7  | 36.3   | 16.8  | 55.8  | 7/7 | fungicide                 |
| DEET (Diethyltoluamide)           | +        | 17.9  | 1.7  | 17.7   | 11.1  | 29.1  | 7/7 | insect repellent          |
| Difenoconazole                    | +        | 64.3  | 3.9  | 14.6   | 11.9  | 17.4  | 2/7 | fungicide                 |
| Dimethachlor-ESA                  | +        | 100   | 14   | 90     | 37    | 184   | 7/7 | TP/M                      |
| Fluconazole                       | +        | 24.8  | 1.0  | 24.8   | 18.0  | 36.5  | 7/7 | fungicide                 |
| Fluometuron                       | +        | 313   | 34   | 368    | 154   | 416   | 3/7 | herbicide                 |
| Metolachlor                       | +        | 32.4  | 4.4  | 17.6   | 9.1   | 94.8  | 5/7 | herbicide                 |
| Picaridin (Icaridin)              | +        | 9.2   | 1.0  | 9.8    | 3.6   | 12.5  | 7/7 | insect repellent          |
| Pirimiphos-methyl                 | +        | 4.64  | 0.38 | 2.94   | 1.41  | 11.91 | 6/7 | insecticide,<br>acaricide |
| Prohexadione                      | +        | 14.7  | 1.4  | 14.5   | 11.6  | 21.7  | 7/7 | plant growth<br>regulator |
| Propachlor-OXA                    | +        | 3.0   | 3.0  | 242.0  | 132.2 | 415.5 | 6/7 | TP/M                      |
| Propamocarb                       | +        | 1.71  | 0.22 | 1.59   | 0.96  | 3.06  | 7/7 | fungicide                 |
| Sethoxydim                        | +        | 488   | 14   | 475    | 340   | 695   | 6/7 | herbicide                 |
| Terbutryn                         | +        | 7.5   |      |        |       |       | 1/7 | herbicide                 |
| Thiamethoxam                      | +        | 29.6  | 2.5  | 20.6   | 12.8  | 64.6  | 4/7 | insecticide               |
| Tralkoxydim                       | +        | 186   | 13   | 186    | 51    | 284   | 7/7 | herbicide                 |
| Fipronil                          | -        | 38.2  | 4.9  | 38.2   | 34.7  | 41.7  | 2/7 | insecticide               |
| Fludioxonil                       | -        | 6.97  | 0.67 | 3.40   | 2.45  | 15.06 | 3/7 | fungicide                 |
| cis-1,2,3,6-Tetrahydrophthalimide | -        | 1512  | 167  | 1498   | 1179  | 1812  | 6/7 | TP/M                      |

**Table S9.** Pesticides determined from 2014 to 2020 in influent wastewater samples of Athens, Greece. Uses and regulatory status (<https://ec.europa.eu/food/plant/pesticides/eu-pesticides-database/active-substances/>, <https://pesticidecompendium.bcpc.org>, <https://echa.europa.eu/>, <http://sitem.herts.ac.uk/aeru/iupac/index.htm>).

| Compound                                                                    | Plant protection<br>active substance                                                                                                                           | Biocidal active<br>substance                                    | Other uses/<br>Other legislation                                                                                                                                                                                                                                                                                                                                               |
|-----------------------------------------------------------------------------|----------------------------------------------------------------------------------------------------------------------------------------------------------------|-----------------------------------------------------------------|--------------------------------------------------------------------------------------------------------------------------------------------------------------------------------------------------------------------------------------------------------------------------------------------------------------------------------------------------------------------------------|
|                                                                             | Current approval<br>status under Reg.<br>(EC) No 1107/2009<br>(EC legislation)                                                                                 | Current approval<br>status under<br>Regulation (EU)<br>528/2009 |                                                                                                                                                                                                                                                                                                                                                                                |
| Acetochlor                                                                  | Not approved<br>(2008/934, Reg. (EU)<br>No 1372/2011)                                                                                                          | -                                                               | -                                                                                                                                                                                                                                                                                                                                                                              |
| Ametryn                                                                     | Not approved<br>(2002/2076)                                                                                                                                    | -                                                               | Registered under the REACH<br>Regulation.<br>Used in formulation or re-<br>packing and in manufacturing.<br>Release to the environment of<br>this substance can occur from<br>industrial use: formulation of<br>mixtures.                                                                                                                                                      |
| Amitrole                                                                    | Not approved<br>(01/21/EC,<br>2010/77/EU, Reg (EU)<br>2015/408, Reg. (EU)<br>2015/1885, Reg. (EU)<br>2016/871, Reg. (EU)<br>No 540/2011)                       | -                                                               | Registered under the REACH<br>Regulation.<br>Used in the following activities or<br>processes at workplace: laboratory<br>work.<br>Other release to the environment of<br>this substance is likely to occur from:<br>indoor use (e.g., machine wash<br>liquids/detergents, automotive care<br>products, paints and coating or<br>adhesives, fragrances and air<br>fresheners). |
| Anabasine                                                                   | -                                                                                                                                                              | -                                                               | Included in the pesticide database<br>( <a href="https://pesticidecompendium.bcpc.org">https://pesticidecompendium.bcpc.org</a> ).<br>Occurrence related to tobacco.                                                                                                                                                                                                           |
| Asulam sodium                                                               | Pending<br>Originally not<br>approved:<br>Reg (EC) 1045/2011<br>(2008/934)                                                                                     | -                                                               | -                                                                                                                                                                                                                                                                                                                                                                              |
| Atrazine &<br>TP/M (atrazine-<br>desethyl and<br>atrazine-<br>desisopropyl) | Not approved<br>(2004/248/EC)                                                                                                                                  | -                                                               | Registered under the REACH<br>Regulation.<br>Used at industrial sites.                                                                                                                                                                                                                                                                                                         |
| Azoxystrobin &<br>TP/M<br>(azoxystrobin<br>acid)                            | Approved<br>(1998/47/EC,<br>2007/21/EC,<br>2010/55/EU, Reg.<br>(EU) 2018/155, Reg.<br>(EU) No 2019/291,<br>Reg. (EU) No<br>540/2011, Reg. (EU)<br>No 703/2011) | -                                                               | -                                                                                                                                                                                                                                                                                                                                                                              |
| Captan & TP/M<br>( <i>cis</i> -1,2,3,6-                                     | Approved                                                                                                                                                       | -                                                               | Registered under the REACH<br>Regulation.                                                                                                                                                                                                                                                                                                                                      |

|                                          |                                                                                                                                                   |                                                                                                 |                                                                                                                                                                                                                                                                                                                                                                   |
|------------------------------------------|---------------------------------------------------------------------------------------------------------------------------------------------------|-------------------------------------------------------------------------------------------------|-------------------------------------------------------------------------------------------------------------------------------------------------------------------------------------------------------------------------------------------------------------------------------------------------------------------------------------------------------------------|
| Tetrahydrophthalimide)                   | (07/5/EC, Reg. (EU) 2018/917, Reg. (EU) 2019/707, Reg. (EU) 2020/869, Reg. (EU) No 540/2011)                                                      |                                                                                                 | Used in articles, by professional workers (widespread uses), in formulation or re-packing and at industrial sites.                                                                                                                                                                                                                                                |
| Carbendazim                              | Not approved (2006/135/EC, 2010/70/EC, 2011/58/EU, Reg (EU) 2015/408, Reg. (EU) No 540/2011, Reg. (EU) No 542/2011)                               | Approved as preservative. Used for films preservation, preservation for construction materials. | Registered under the REACH Regulation.<br>Used in formulation or re-packing.                                                                                                                                                                                                                                                                                      |
| Carbofuran & TP/M (carbofuran-3-hydroxy) | Not approved (2007/416)                                                                                                                           | -                                                                                               | -                                                                                                                                                                                                                                                                                                                                                                 |
| Carboxin                                 | Approved (2011/52/EU, Reg. (EU) No 2018/1266, Reg. (EU) No 2019/324, Reg. (EU) No 540/2011)                                                       | -                                                                                               | -                                                                                                                                                                                                                                                                                                                                                                 |
| Climbazole                               | Not included in the EU pesticides database                                                                                                        | -                                                                                               | Registered under the REACH Regulation.<br>Used in the following products: cosmetics and personal care products.<br>Other release to the environment of this substance is likely to occur from indoor use as processing aid.<br>Included in the pesticide database ( <a href="https://pesticidecompendium.bcp.c.org/">https://pesticidecompendium.bcp.c.org/</a> ) |
| Cyproconazole                            | Approved (2011/56/EU, Reg. (EU) No 540/2011)                                                                                                      | Approved as wood preservative (approval currently expired).                                     | Registered under the REACH Regulation.                                                                                                                                                                                                                                                                                                                            |
| Cyprodinil                               | Approved (06/64/EC, Reg. (EU) 2018/524, Reg. (EU) 2019/168, Reg. (EU) 2020/421, Reg. (EU) 2021/566, Reg. (EU) No 540/2011, Reg. (EU) No 678/2014) | -                                                                                               | -                                                                                                                                                                                                                                                                                                                                                                 |
| DEET                                     | Not included in the EU pesticides database                                                                                                        | Approved for pest control (Repellents and attractants).                                         | -                                                                                                                                                                                                                                                                                                                                                                 |
| Difenoconazole                           | Approved (2008/69, Reg. (EU) 2018/1796, Reg. (EU) 2019/1589, Reg. (EU) 2020/1511, Reg. (EU) No 1100/2011, Reg. (EU) No 540/2011)                  | -                                                                                               | -                                                                                                                                                                                                                                                                                                                                                                 |
| Dimethachlor & TP/M (dimethachlor-ESA)   | Approved (2009/77/EC, Reg. (EU) No 540/2011)                                                                                                      | -                                                                                               | -                                                                                                                                                                                                                                                                                                                                                                 |

|              |                                                                                                                                                                          |                                                                                                                                                                                                  |                                                                                                                                                                                                                                                                                                                                                                                                                                                                                                                                                                                                                                                                                                                                                                           |
|--------------|--------------------------------------------------------------------------------------------------------------------------------------------------------------------------|--------------------------------------------------------------------------------------------------------------------------------------------------------------------------------------------------|---------------------------------------------------------------------------------------------------------------------------------------------------------------------------------------------------------------------------------------------------------------------------------------------------------------------------------------------------------------------------------------------------------------------------------------------------------------------------------------------------------------------------------------------------------------------------------------------------------------------------------------------------------------------------------------------------------------------------------------------------------------------------|
| Dimethoate   | Not approved<br>(07/25/EC, Reg. (EU)<br>2018/917, Reg. (EU)<br>2019/1090, Reg. (EU)<br>2019/707, Reg. (EU)<br>No 540/2011)                                               | -                                                                                                                                                                                                | -                                                                                                                                                                                                                                                                                                                                                                                                                                                                                                                                                                                                                                                                                                                                                                         |
| Dinoterb     | Not approved<br>(98/269/EC)                                                                                                                                              | -                                                                                                                                                                                                | -                                                                                                                                                                                                                                                                                                                                                                                                                                                                                                                                                                                                                                                                                                                                                                         |
| Fenamiphos   | Not approved<br>(06/85/EC, Reg. (EU)<br>2015/415, Reg. (EU)<br>2018/917, Reg. (EU)<br>2019/707, Reg. (EU)<br>2020/1246, Reg. (EU)<br>2020/869, Reg. (EU)<br>No 540/2011) | -                                                                                                                                                                                                | -                                                                                                                                                                                                                                                                                                                                                                                                                                                                                                                                                                                                                                                                                                                                                                         |
| Fipronil     | Not approved<br>(07/52/EC,<br>2010/21/EU, Reg (EU)<br>2015/408, Reg. (EU)<br>2016/2035, Reg. (EU)<br>No 540/2011, Reg.<br>(EU) No 781/2013)                              | Approved as<br>insecticides,<br>acaricides and<br>products to control<br>other arthropods.                                                                                                       | Registered under the REACH<br>Regulation.                                                                                                                                                                                                                                                                                                                                                                                                                                                                                                                                                                                                                                                                                                                                 |
| Fluconazole  | Not included in the<br>EU pesticides database                                                                                                                            | -                                                                                                                                                                                                | Used as antifungal medicine.<br>Listed in the NORMAN Suspect List<br>Exchange<br>( <a href="https://pubchem.ncbi.nlm.nih.gov/">https://pubchem.ncbi.nlm.nih.gov/</a> )                                                                                                                                                                                                                                                                                                                                                                                                                                                                                                                                                                                                    |
| Fluidioxonil | Approved<br>(2007/76, Reg. (EU)<br>2018/1262, Reg. (EU)<br>2019/1589, Reg. (EU)<br>2020/1511, Reg. (EU)<br>No 540/2011)                                                  | Approved as<br>preservative. Used<br>as<br>- Film preservative,<br>- Fibre, leather,<br>rubber and<br>polymerised<br>materials<br>preservatives,<br>- Construction<br>material<br>preservatives. | -                                                                                                                                                                                                                                                                                                                                                                                                                                                                                                                                                                                                                                                                                                                                                                         |
| Fluometuron  | Approved<br>(2011/57/EU, Reg.<br>(EU) 2020/2007, Reg.<br>(EU) No 2018/1266,<br>Reg. (EU) No<br>540/2011)                                                                 | -                                                                                                                                                                                                | Registered under the REACH<br>Regulation.<br>Used in articles, in formulation or re-<br>packing and at industrial sites.<br>Other release to the environment of<br>this substance is likely to occur from<br>outdoor use in long-life materials<br>with low release rate (e.g., metal,<br>wooden and plastic construction and<br>building materials) and indoor use in<br>long-life materials with low release<br>rate (e.g., flooring, furniture, toys,<br>construction materials, curtains,<br>footwear, leather products, paper and<br>cardboard products, electronic<br>equipment).<br>This substance can be found in<br>complex articles, with no release<br>intended: vehicles and machinery,<br>mechanical appliances and<br>electrical/electronic products (e.g., |



|                                                        |                                                                                                                         |                                             |                                                                                                                                                                                                                                                                                                                                                                                                                                                                                                                                                                                  |
|--------------------------------------------------------|-------------------------------------------------------------------------------------------------------------------------|---------------------------------------------|----------------------------------------------------------------------------------------------------------------------------------------------------------------------------------------------------------------------------------------------------------------------------------------------------------------------------------------------------------------------------------------------------------------------------------------------------------------------------------------------------------------------------------------------------------------------------------|
|                                                        |                                                                                                                         |                                             | computers, cameras, lamps, refrigerators, washing machines).                                                                                                                                                                                                                                                                                                                                                                                                                                                                                                                     |
| Flutolanil                                             | Approved<br>(2008/108, Reg. (EU)<br>2019/168, Reg. (EU)<br>2019/2094, Reg. (EU)<br>2021/52, Reg. (EU)<br>No 540/2011)   | -                                           | -                                                                                                                                                                                                                                                                                                                                                                                                                                                                                                                                                                                |
| Irgarol                                                | Not included in the<br>EU pesticides database                                                                           | -                                           | Used in the past as booster biocide agent, added in copper-based antifouling paints, applied in surfaces submerged in water to prevent biofouling.                                                                                                                                                                                                                                                                                                                                                                                                                               |
| Metalaxyl                                              | Approved<br>(2010/28/EU, Reg.<br>(EU) 2015/1885, Reg.<br>(EU) 2017/2069, Reg.<br>(EU) No 540/2011)                      | -                                           | -                                                                                                                                                                                                                                                                                                                                                                                                                                                                                                                                                                                |
| Metolachlor &<br>TP/M<br>(metolachlor-<br>morpholinon) | Approved (S-<br>Metolachlor) (Reg EU<br>2021/745, 05/3/EC,<br>Reg. (EU) No<br>540/2011)                                 | -                                           | -                                                                                                                                                                                                                                                                                                                                                                                                                                                                                                                                                                                |
| Napropamide                                            | Approved<br>(2010/83/EU, Reg.<br>(EU) 2018/670, Reg.<br>(EU) No 540/2011)                                               | -                                           | -                                                                                                                                                                                                                                                                                                                                                                                                                                                                                                                                                                                |
| Nicosulfuron                                           | Approved<br>(2008/40, Reg. (EU)<br>2018/1796, Reg. (EU)<br>2019/1589, Reg. (EU)<br>2020/1511, Reg. (EU)<br>No 540/2011) | -                                           | -                                                                                                                                                                                                                                                                                                                                                                                                                                                                                                                                                                                |
| Penconazole                                            | Approved<br>(2009/77/EC,<br>2010/34/EU, Reg.<br>(EU) No 540/2011)                                                       | -                                           | -                                                                                                                                                                                                                                                                                                                                                                                                                                                                                                                                                                                |
| Phthalate<br>dimethyl                                  | Not included in the<br>EU pesticides database                                                                           | -                                           | Registered under the REACH Regulation.<br>Used in the following products: perfumes and fragrances, cosmetics and personal care products, coating products, air care products and washing & cleaning products.<br>Other release to the environment of this substance is likely to occur from indoor use (e.g., machine wash liquids/detergents, automotive care products, paints and coating or adhesives, fragrances and air fresheners), outdoor use and indoor use in close systems with minimal release (e.g., cooling liquids in refrigerators, oil-based electric heaters). |
| Picaridin<br>(Icaridin)                                | Not included in the<br>EU pesticides database                                                                           | Approved as<br>repellent and<br>attractant. | Registered under the REACH Regulation.                                                                                                                                                                                                                                                                                                                                                                                                                                                                                                                                           |

|                                    |                                                                                                                                                      |                                                                                                                                                                          |                                                                                                                                                                                                                                                                                                                         |
|------------------------------------|------------------------------------------------------------------------------------------------------------------------------------------------------|--------------------------------------------------------------------------------------------------------------------------------------------------------------------------|-------------------------------------------------------------------------------------------------------------------------------------------------------------------------------------------------------------------------------------------------------------------------------------------------------------------------|
| Pirimiphos methyl                  | Approved<br>(07/52/EC, Reg. (EU)<br>2018/917, Reg. (EU)<br>2019/707, Reg. (EU)<br>2020/869, Reg. (EU)<br>No 540/2011)                                | -                                                                                                                                                                        | -                                                                                                                                                                                                                                                                                                                       |
| Prohexadione                       | Approved<br>(2000/50/EC,<br>2007/21/EC,<br>2010/56/EU, Reg.<br>(EU) No 2019/291,<br>Reg. (EU) No<br>540/2011, Reg. (EU)<br>No 702/2011)              | -                                                                                                                                                                        | -                                                                                                                                                                                                                                                                                                                       |
| Propachlor & TP/M (propachlor-OXA) | Not approved<br>(2008/742)                                                                                                                           | -                                                                                                                                                                        | Included in the pesticide database ( <a href="http://sitem.herts.ac.uk/aeru/iupac/index.htm">http://sitem.herts.ac.uk/aeru/iupac/index.htm</a> ).<br>A pre-emergence herbicide for control of annual grasses and some broad-leaved weeds.                                                                               |
| Propamocarb                        | Approved<br>(7/25/EC, Reg. (EU)<br>2018/917, Reg. (EU)<br>2019/707, Reg. (EU)<br>2020/869, Reg. (EU)<br>No 540/2011)                                 | -                                                                                                                                                                        | -                                                                                                                                                                                                                                                                                                                       |
| Propiconazole                      | Not approved<br>(03/70/EC, Reg. (EU)<br>2016/2016, Reg. (EU)<br>2018/1865, Reg. (EU)<br>No 540/2011, Reg.<br>(EU) No 823/2012,<br>Reg. (EU) 2018/84) | Approved as preservative.<br>Used for preservation films, wood preservation, preservation of fibres, leather, rubber, or polymers.                                       | Registered under the REACH Regulation.<br>Used in formulation or re-packing.                                                                                                                                                                                                                                            |
| Sethoxydim                         | Not approved                                                                                                                                         | -                                                                                                                                                                        | Included in the pesticide database ( <a href="http://sitem.herts.ac.uk/aeru/iupac/index.htm">http://sitem.herts.ac.uk/aeru/iupac/index.htm</a> ).<br>A post-emergence, selective, annual and perennial grass weed herbicide.                                                                                            |
| Tebuconazole                       | Approved<br>(2008/125, Reg. (EU)<br>2019/707, Reg. (EU)<br>2020/1160, Reg. (EU)<br>No 540/2011, Reg.<br>(EU) No 921/2014)                            | Approved as preservative. Used as<br>- Film preservative,<br>- Fibre, leather, rubber and polymerised materials preservatives,<br>- Construction material preservatives. | Registered under the REACH Regulation.                                                                                                                                                                                                                                                                                  |
| Terbacil                           | Not approved<br>(2002/2076)                                                                                                                          | -                                                                                                                                                                        | Included in the pesticide database ( <a href="http://sitem.herts.ac.uk/aeru/iupac/index.htm">http://sitem.herts.ac.uk/aeru/iupac/index.htm</a> ).<br>Herbicide for control of annual grasses, broad-leaved weeds and some perennial weeds that is used on a range of crops including top fruit, lucerne and some herbs. |

|              |                                                                                                                                                          |                                                                                                                                                                                      |                                                                                                   |
|--------------|----------------------------------------------------------------------------------------------------------------------------------------------------------|--------------------------------------------------------------------------------------------------------------------------------------------------------------------------------------|---------------------------------------------------------------------------------------------------|
| Terbutryn    | Not approved<br>(2002/2076)                                                                                                                              | Under evaluation as preservative for uses as:<br>- Film preservative,<br>- Fibre, leather, rubber and polymerised materials preservatives,<br>- Construction material preservatives. | -                                                                                                 |
| Thiamethoxam | Not approved<br>(07/6/EC, 2010/21/EU, Reg. (EU) No 2018/524, Reg. (EU) No 2018/785, Reg. (EU) No 485/2013, Reg. (EU) No 487/2014, Reg. (EU) No 540/2011) | Approved as wood preservative in the past (expired approval). Currently approved as insecticides, acaricides and products to control other arthropods.                               | Registered under the REACH Regulation.<br>Used in formulation or re-packing and in manufacturing. |
| Thiodicarb   | Not approved                                                                                                                                             | -                                                                                                                                                                                    | -                                                                                                 |
| Tralkoxydim  | Not approved<br>(2008/107, Reg. (EU) No 540/2011)                                                                                                        | -                                                                                                                                                                                    | -                                                                                                 |
